# Supplementary material for: BCN network-encapsulated multiple phases of molybdenum carbide for efficient hydrogen evolution reactions in acidic and alkaline media
Source: Royal Society of Chemistry journal article supplement (doi:10.1039/c7ta03407e), 2017-01-01
Supplement: c7ta03407e1.pdf [file c7ta03407e1.pdf]

## Electronic Supplementary information

### BCN Network-Encapsulated Multiple Phases of Molybdenum Carbide for Efficient Hydrogen Evolution Reaction in Acidic and Alkaline Media

Mohsin Ali Raza Anjum, Min Hee Lee and Jae Sung Lee\*

School of Energy and Chemical Engineering, Ulsan National Institute of Science and Technology (UNIST), 50 UNIST-gil, Ulsan 44919, South Korea

This file includes supplementary Figures S1-S20, and Tables S1- S6.

**Table S1.** Composition of starting materials for preparation of multiple phase of molybdenum carbides

| Name                              | Imidazole | Boric acid | MoCl <sub>5</sub> |
|-----------------------------------|-----------|------------|-------------------|
| <i>o</i> -β-Mo <sub>2</sub> C     | 5 mmol    | NIL        | 1 mmol            |
| <i>o</i> -α-Mo <sub>2</sub> C@BCN | 5 mmol    | 1 mmol     | 1 mmol            |
| <i>h</i> -η-MoC@BCN               | 5 mmol    | 2 mmol     | 1 mmol            |
| <i>h</i> -β-Mo <sub>2</sub> C@BCN | 5 mmol    | 3 mmol     | 1 mmol            |
| <i>c</i> -α-Mo <sub>2</sub> C@BCN | 5 mmol    | 4 mmol     | 1 mmol            |
| <i>o</i> -β-Mo <sub>2</sub> C@BCN | 5 mmol    | 5 mmol     | 1 mmol            |

Imidazole = (CH)<sub>2</sub>N(NH)CH: Boric acid = H<sub>3</sub>BO<sub>3</sub>

**Table S2.** Information of multiple phases of as synthesized molybdenum carbides

| Name                                         | Phase                                                            | Crystal system        | Space group | Reference code             | Crystal view                                                                          |
|----------------------------------------------|------------------------------------------------------------------|-----------------------|-------------|----------------------------|---------------------------------------------------------------------------------------|
| <i>o</i> - $\alpha$ -Mo <sub>2</sub> C@BCN   | $\alpha$ -Mo <sub>2</sub> C<br>like Ni <sub>2</sub> C            | Orthorhombic          | Pbcn        | 01-071-0242                | 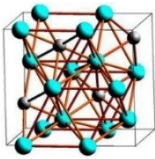   |
|                                              |                                                                  |                       |             |                            | J. Phys.: Condens. Matter 2010,22, 445503                                             |
| <i>h</i> - $\eta$ -MoC@BCN                   | $\eta$ -MoC                                                      | Hexagonal             | P63/mmc     | 01-089-4305                |    |
|                                              |                                                                  |                       |             |                            | Angew. Chem, 2014, 126, 6525                                                          |
| <i>h</i> - $\beta$ -Mo <sub>2</sub> C@BCN    | $\beta$ -Mo <sub>2</sub> C                                       | Hexagonal             | P63/mmc     | 03-065-8364                |    |
|                                              |                                                                  |                       |             |                            | Angew. Chem, 2014, 126, 6525                                                          |
| <i>c</i> - $\alpha$ -MoC <sub>1-x</sub> @BCN | $\alpha$ -MoC <sub>1-x</sub><br>&<br>$\alpha$ -Mo <sub>2</sub> C | Cubic<br>Orthorhombic | Fm3m        | 03-065-0280<br>01-071-0242 |   |
|                                              |                                                                  |                       |             |                            | Phys. Chem. Chem. Phys., 2013, 15, 12617                                              |
| <i>o</i> - $\beta$ -Mo <sub>2</sub> C@BCN    | $\beta$ -Mo <sub>2</sub> C                                       | Orthorhombic          | Pca21       | 01-077-0720                |  |
|                                              |                                                                  |                       |             |                            | Phys. Chem. Chem. Phys., 2013, 15, 12617                                              |

**Table S3.** Surface composition of each phase of molybdenum carbides determined by XPS

| Sample                                     | Mo<br>[At. %] | C<br>[At. %] | N<br>[At. %] | B<br>[At. %] | O<br>[At. %] |
|--------------------------------------------|---------------|--------------|--------------|--------------|--------------|
| <i>o</i> - $\alpha$ -Mo <sub>2</sub> C@BCN | 10.44         | 60.81        | 17.37        | 1.04         | 10.34        |
| <i>h</i> - $\eta$ -MoC@BCN                 | 10.39         | 55.93        | 24.27        | 1.23         | 8.18         |
| <i>h</i> - $\beta$ -Mo <sub>2</sub> C@BCN  | 11.03         | 59.09        | 21.17        | 1.60         | 7.11         |
| <i>c</i> - $\alpha$ -Mo <sub>2</sub> C@BCN | 11.3          | 60.02        | 18.7         | 3.15         | 6.83         |
| <i>o</i> - $\beta$ -Mo <sub>2</sub> C@BCN  | 13.50         | 60.49        | 12.84        | 4.05         | 9.12         |

**Table S 4.** Comparison of HER performance in acid (0.5M H<sub>2</sub>SO<sub>4</sub>) media with other molybdenum carbides based electrocatalysts

| Catalyst                                                                         | Onset (mV) | $\eta_1$ (mV) | $\eta_{10}$ (mV) | Tafel Slope (mV/dec) | $J_0$ (mA/cm <sup>2</sup> ) | Electrolyte                         |
|----------------------------------------------------------------------------------|------------|---------------|------------------|----------------------|-----------------------------|-------------------------------------|
| <i>c</i> - $\alpha$ -MoC <sub>1-x</sub> @BCN                                     | 20         | 25            | 124              | 47<br>167            | 0.124<br>1.505              | 0.5M H <sub>2</sub> SO <sub>4</sub> |
| <i>h</i> - $\beta$ -Mo <sub>2</sub> C@BCN                                        | 20         | 30            | 140              | 103                  | 0.392                       | 0.5M H <sub>2</sub> SO <sub>4</sub> |
| <i>o</i> - $\beta$ -Mo <sub>2</sub> C@BCN                                        | 48         | 76            | 168              | 80                   | 0.109                       | 0.5M H <sub>2</sub> SO <sub>4</sub> |
| <i>h</i> - $\eta$ -MoC@BCN                                                       | 45         | 101           | 182              | 67                   | 0.006                       | 0.5M H <sub>2</sub> SO <sub>4</sub> |
| <i>o</i> - $\alpha$ -Mo <sub>2</sub> C@BCN                                       | 40         | 120           | 195              | 73                   | 0.011                       | 0.5M H <sub>2</sub> SO <sub>4</sub> |
| Mo <sub>2</sub> C-carbon nanocomposites <sup>1</sup>                             |            | 160           | 260              | 110                  |                             | 0.5M H <sub>2</sub> SO <sub>4</sub> |
| Mo <sub>0.06</sub> W <sub>1.94</sub> C/CB <sup>2</sup>                           |            | 150           | 220              |                      |                             | 0.5M H <sub>2</sub> SO <sub>4</sub> |
| Mo <sub>2</sub> C/Graphitic Carbon Sheets <sup>3</sup>                           | 120        | 160           | 210              | 62.6                 | 0.0125                      | 0.5M H <sub>2</sub> SO <sub>4</sub> |
| Mo <sub>2</sub> C <sup>4</sup>                                                   |            | 155           | 210              | 56                   | 0.0013                      | 0.5M H <sub>2</sub> SO <sub>4</sub> |
| Mo <sub>2</sub> C NWs <sup>5</sup>                                               | 110        | 115           | 200              | 55.8                 |                             | 0.5M H <sub>2</sub> SO <sub>4</sub> |
| Mo <sub>2</sub> C nanoparticles <sup>6</sup>                                     |            | 150           | 198              | 56                   |                             | 0.5M H <sub>2</sub> SO <sub>4</sub> |
| MoS <sub>2</sub> /Mo <sub>2</sub> C embedded N-CNT <sup>7</sup>                  | 145        |               | 190              | 69                   |                             | 0.5M H <sub>2</sub> SO <sub>4</sub> |
| Mo1Soy( $\beta$ -Mo <sub>2</sub> C and $\gamma$ -Mo <sub>2</sub> N) <sup>8</sup> |            | 120           | 177              | 66.4                 | 0.037                       | 0.1M HClO <sub>4</sub>              |
| MoS <sub>x</sub> @Mo <sub>2</sub> C <sup>9</sup>                                 | 120        | 130           | 170              | 52                   | 0.131                       | 0.5M H <sub>2</sub> SO <sub>4</sub> |
| Mo <sub>2</sub> C on CNT <sup>10</sup>                                           |            | 63            | 152              | 55.2                 | 0.014                       | 0.1M HClO <sub>4</sub>              |
| Ni-Mo <sub>2</sub> C nano-rod <sup>11</sup>                                      | 80         | 100           | 150              | 58                   | 0.033                       | 0.5M H <sub>2</sub> SO <sub>4</sub> |
| 3D Mo <sub>x</sub> C/Ni network <sup>12</sup>                                    |            | 44            | 150              | 49                   |                             | 0.5M H <sub>2</sub> SO <sub>4</sub> |
| Mo <sub>2</sub> C-NCNT <sup>13</sup>                                             | 65         | 72            | 147              | 71                   | 0.114                       | 0.5M H <sub>2</sub> SO <sub>4</sub> |
| MoCN <sup>14</sup>                                                               | 50         | 55            | 145              | 46                   |                             | 0.5M H <sub>2</sub> SO <sub>4</sub> |
| Mesoporous $\eta$ -MoC <sub>x</sub> nano-octahedrons <sup>15</sup>               |            | 87            | 142              | 53                   |                             | 0.5M H <sub>2</sub> SO <sub>4</sub> |
| Mo <sub>2</sub> C, CNT-Graphene composite <sup>16</sup>                          | 62         | 90            | 130              | 58                   | 0.062                       | 0.5M H <sub>2</sub> SO <sub>4</sub> |
| Mo <sub>2</sub> C on RGO <sup>17</sup>                                           | 70         | 91            | 130              | 57.3                 |                             | 0.5M H <sub>2</sub> SO <sub>4</sub> |
| nanoporous Mo <sub>2</sub> C nanowires <sup>18</sup>                             |            | 70            | 130              | 53                   |                             | 0.5M H <sub>2</sub> SO <sub>4</sub> |
| Mo <sub>2</sub> C@NC <sup>19</sup>                                               | -          | 60            | 124              | 60                   | 0.096                       | 0.5M H <sub>2</sub> SO <sub>4</sub> |
| NS-doped Mo <sub>2</sub> C <sup>20</sup>                                         | 46         | 56            | 86               | 47                   | 0.038                       | 0.5M H <sub>2</sub> SO <sub>4</sub> |
| Mo <sub>2</sub> C-Ni@NCV <sup>21</sup>                                           | 20         | 22            | 75               | 45                   |                             | 0.5M H <sub>2</sub> SO <sub>4</sub> |
| $\beta$ - Mo <sub>2</sub> C <sup>22</sup>                                        |            | 205           |                  | 120                  | 0.01729                     | 0.5M H <sub>2</sub> SO <sub>4</sub> |

**Table S5.** Comparison of HER performance of multiple phases of molybdenum carbides encapsulated by BCN with other Mo<sub>2</sub>C-based electrocatalysts in alkaline media

| Catalyst                                                                           | Onset (mV) | $\eta_1$ (mV) | $\eta_{10}$ (mV) | Tafel Slope (mV/dec) | $J_0$ (mA/cm <sup>2</sup> ) | Electrolyte |
|------------------------------------------------------------------------------------|------------|---------------|------------------|----------------------|-----------------------------|-------------|
| <i>h</i> - $\beta$ -Mo <sub>2</sub> C@BCN                                          |            | 45            | 92               | 52.8                 | 0.162                       | 1.0M NaOH   |
| <i>h</i> - $\eta$ -Mo <sub>2</sub> C@BCN                                           |            | 65            | 116              | 53.4                 | 0.063                       | 1.0M NaOH   |
| <i>o</i> - $\alpha$ -Mo <sub>2</sub> C@BCN                                         |            | 63            | 119              | 58.5                 | 0.0861                      | 1.0M NaOH   |
| <i>o</i> - $\beta$ -Mo <sub>2</sub> C@BCN                                          |            | 69            | 126              | 60                   | 0.075                       | 1.0M NaOH   |
| <i>c</i> - $\alpha$ -MoC <sub>1-x</sub> @BCN                                       |            | 73            | 141              | 73                   | 0.113                       | 1.0M NaOH   |
| <i>h</i> - $\beta$ -Mo <sub>2</sub> C@BCN                                          |            | 46            | 98               | 55                   | 0.162                       | 1.0M KOH    |
| <i>h</i> - $\eta$ -Mo <sub>2</sub> C@BCN                                           |            | 52            | 106              | 55.4                 | 0.120                       | 1.0M KOH    |
| <i>o</i> - $\alpha$ -Mo <sub>2</sub> C@BCN                                         |            | 49            | 111              | 68                   | 0.218                       | 1.0M KOH    |
| <i>o</i> - $\beta$ -Mo <sub>2</sub> C@BCN                                          |            | 56            | 110              | 59                   | 0.127                       | 1.0M KOH    |
| <i>c</i> - $\alpha$ -MoC <sub>1-x</sub> @BCN                                       |            | 62            | 154              | 98                   | 0.225                       | 1.0M KOH    |
| Dual-doped Co@BCN <sup>23</sup>                                                    |            | 70            | 183              | 73.2                 |                             | 1.0M KOH    |
| Mo <sub>2</sub> C-NCNT <sup>13</sup>                                               | 190        | 195           | 257              |                      |                             | 1.0M KOH    |
| Mo <sub>2</sub> C <sup>24</sup>                                                    |            | 130           | 190              | 54                   | 0.0038                      | 1.0M KOH    |
| Mo <sub>2</sub> C nanoparticles <sup>6</sup>                                       |            | 110           | 176              | 58                   |                             | 1.0M KOH    |
| Mesoporous $\eta$ -MoC <sub>x</sub> nano-octahedrons <sup>15</sup>                 |            | 92            | 151              | 59                   |                             | 1.0M KOH    |
| Mo <sub>2</sub> C nano-rod Ni impregnated Mo <sub>2</sub> C nano-rod <sup>11</sup> |            | 48            | 130              | 49                   | 0.27                        | 1.0M KOH    |
| Mo <sub>2</sub> C@NC <sup>19</sup>                                                 | -          | 10            | 60               |                      |                             | 1.0M KOH    |

**Table S6.** Electrochemical active surface area (ECSA) and specific capacitance of all composites

| Sample                                       | $A_{ECSA} = \frac{\text{Specific Capacitance}}{40 \mu\text{F}\cdot\text{cm}^{-2} \text{ per } \text{cm}_{ECSA}^2} \text{ Ref. }^{25}$ |                                               |                         |                                               |                         |                                               |
|----------------------------------------------|---------------------------------------------------------------------------------------------------------------------------------------|-----------------------------------------------|-------------------------|-----------------------------------------------|-------------------------|-----------------------------------------------|
|                                              | C (μF/cm <sup>2</sup> )                                                                                                               | $A_{ECSA}$ (cm <sup>2</sup> <sub>ECSA</sub> ) | C (μF/cm <sup>2</sup> ) | $A_{ECSA}$ (cm <sup>2</sup> <sub>ECSA</sub> ) | C (μF/cm <sup>2</sup> ) | $A_{ECSA}$ (cm <sup>2</sup> <sub>ECSA</sub> ) |
|                                              | 0.5M H <sub>2</sub> SO <sub>4</sub>                                                                                                   |                                               | 1.0M NaOH               |                                               | 1.0M KOH                |                                               |
| <i>o</i> - $\alpha$ -Mo <sub>2</sub> C@BCN   | 13910                                                                                                                                 | 348                                           | 14090                   | 352                                           | 17800                   | 445                                           |
| <i>h</i> - $\eta$ -Mo <sub>2</sub> C@BCN     | 4170                                                                                                                                  | 104                                           | 10340                   | 258                                           | 6410                    | 160                                           |
| <i>h</i> - $\beta$ -Mo <sub>2</sub> C@BCN    | 5610                                                                                                                                  | 140                                           | 5910                    | 148                                           | 4990                    | 125                                           |
| <i>c</i> - $\alpha$ -MoC <sub>1-x</sub> @BCN | 9280                                                                                                                                  | 232                                           | 6600                    | 165                                           | 7090                    | 177                                           |
| <i>o</i> - $\beta$ -Mo <sub>2</sub> C@BCN    | 2430                                                                                                                                  | 61                                            | 401.82                  | 10                                            | 1500                    | 37.5                                          |

A

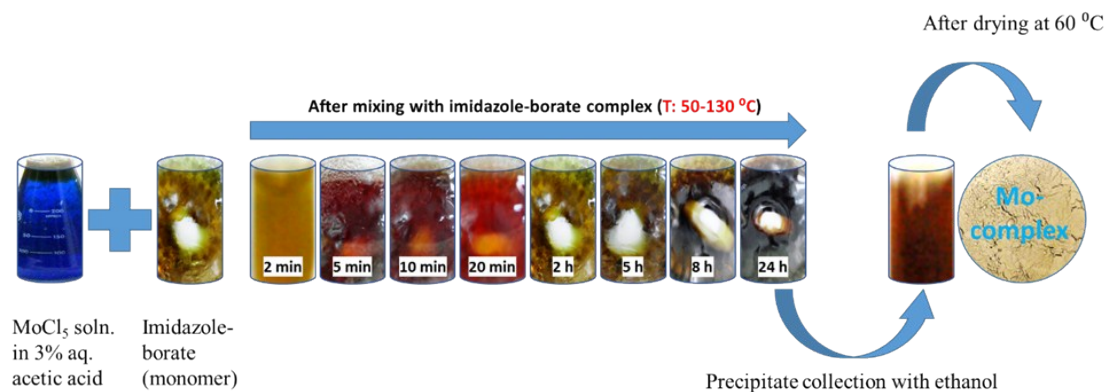

B

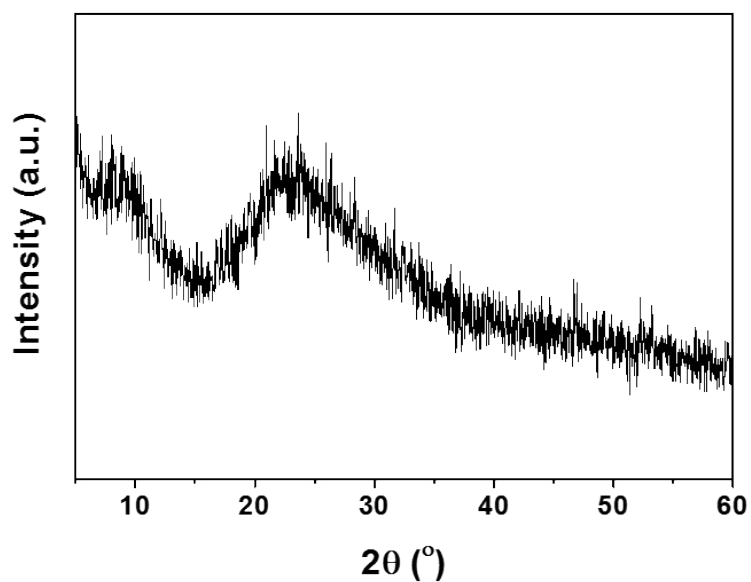

**Figure S1.** (A) Color change with reaction time and collected organometallic complex precipitate. (B) XRD pattern of a Mo-Im-Borate organometallic complex

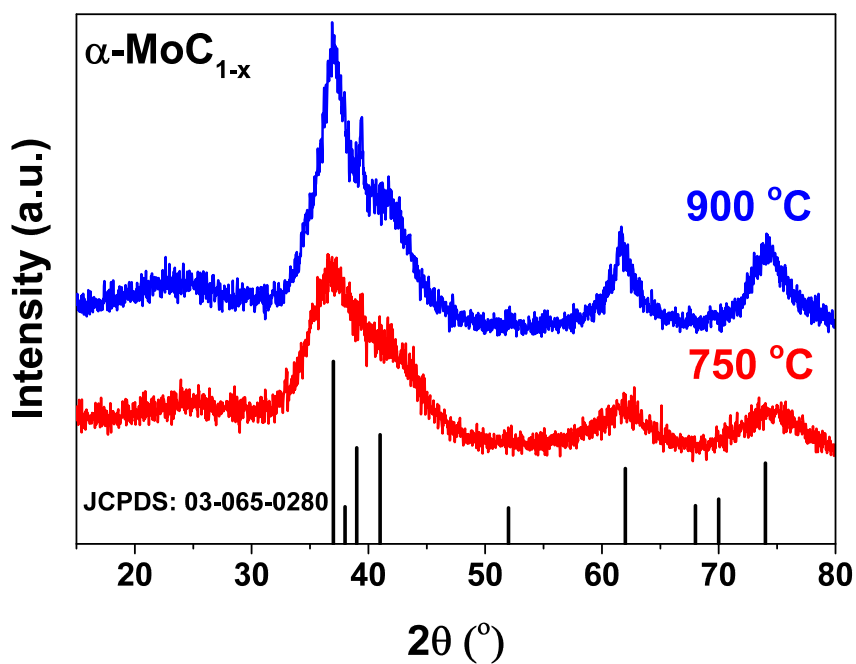

**Figure S2.** XRD pattern of c- $\alpha\text{-MoC}_{1-x}$  synthesized at 750 and 900 °C (JCPDS 03-065-0280)

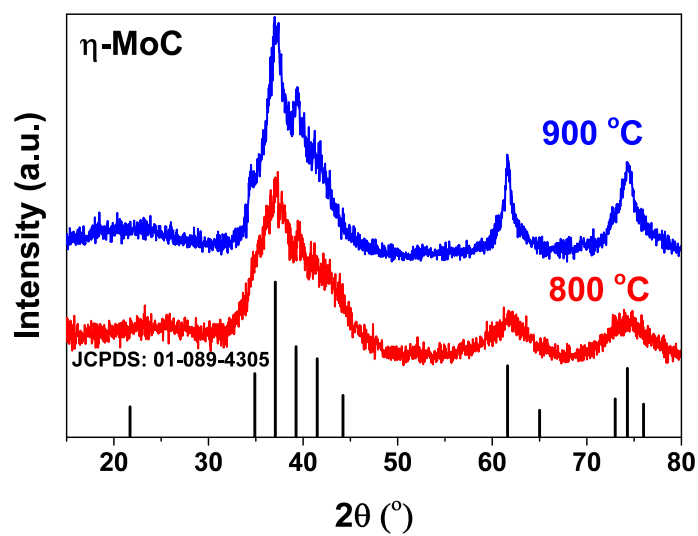

**Figure S3.** XRD pattern of h- $\eta\text{-MoC}$  synthesized at 800 and 900 °C (JCPDS 01-089-4305)

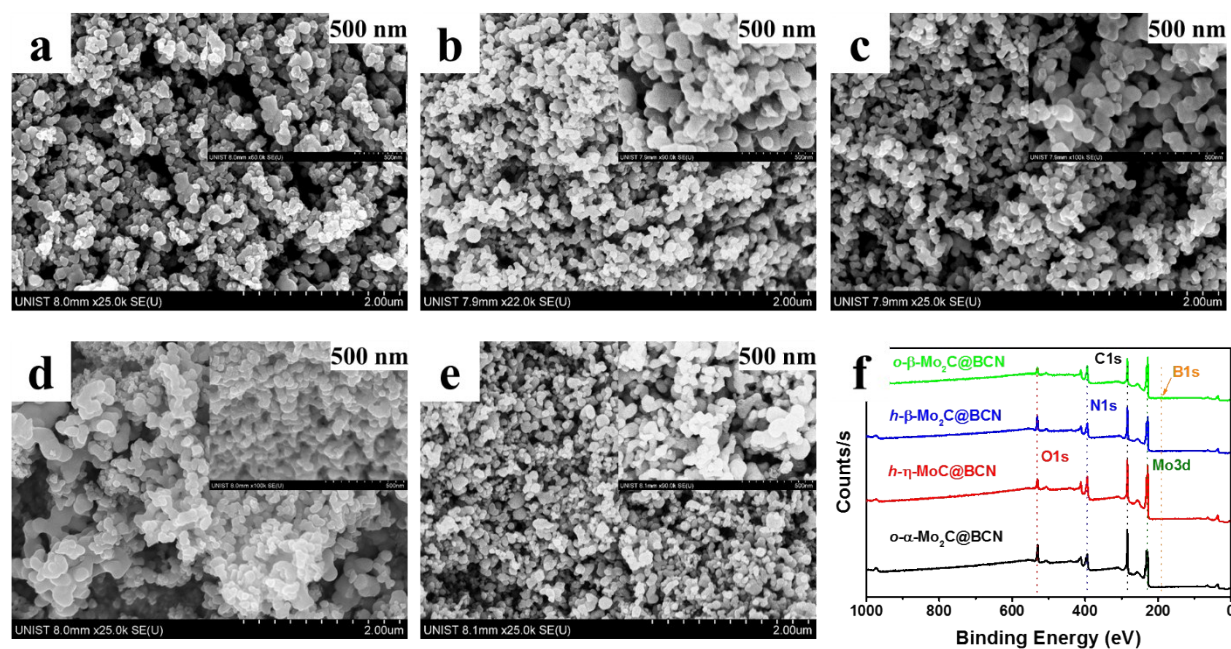

**Figure S4.** FESEM images and XPS survey. (a) Orthorhombic  $\alpha$ - $\text{Mo}_2\text{C}$ @BCN. (b) Hexagonal  $\eta$ - $\text{MoC}$ @BCN. (c) Hexagonal  $\beta$ - $\text{Mo}_2\text{C}$ @BCN. (d) Cubic  $\alpha$ - $\text{MoC}_{1-x}$ @BCN. (e) Orthorhombic  $\beta$ - $\text{Mo}_2\text{C}$ @BCN. (f) XPS survey of multiple phases of molybdenum carbides

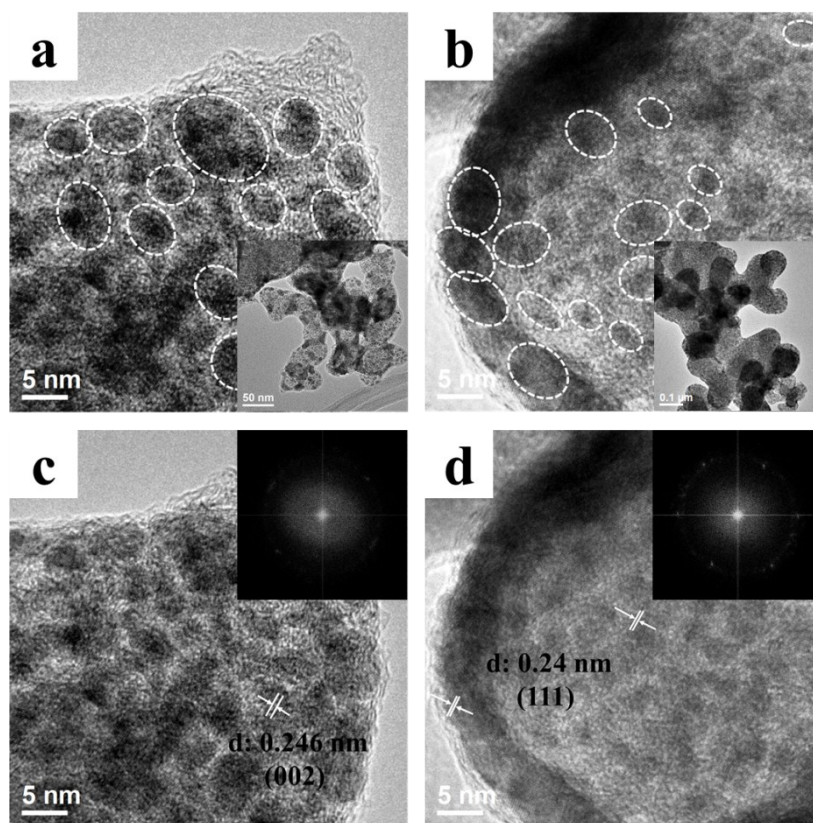

**Figure S5.** TEM images of o- $\alpha$ -Mo<sub>2</sub>C@BCN (a), c- $\alpha$ -MoC<sub>1-x</sub>@BCN (b), o- $\alpha$ -Mo<sub>2</sub>C@BCN (c) and c- $\alpha$ -MoC<sub>1-x</sub>@BCN (d). Insets are low magnification (a,b) and Forward Fourier Transform (FFT) images.



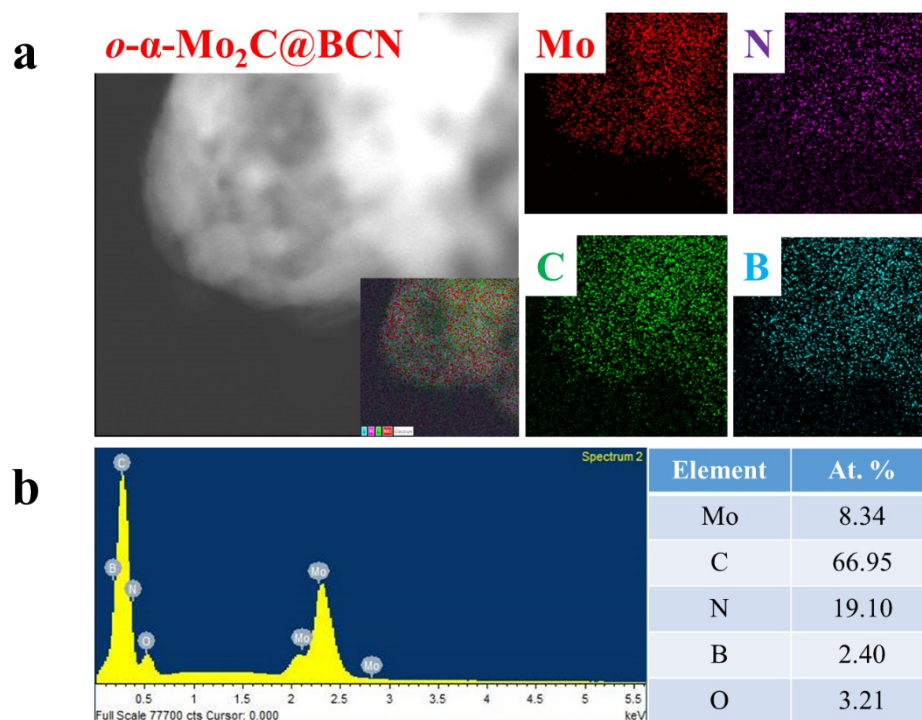

**Figure S6.** EDX elemental mapping of (a) *o*- $\alpha$ -Mo<sub>2</sub>C@BCN (inset combined image of elemental mapping) and (b) EDS-SEM spectrum with composition in Table.

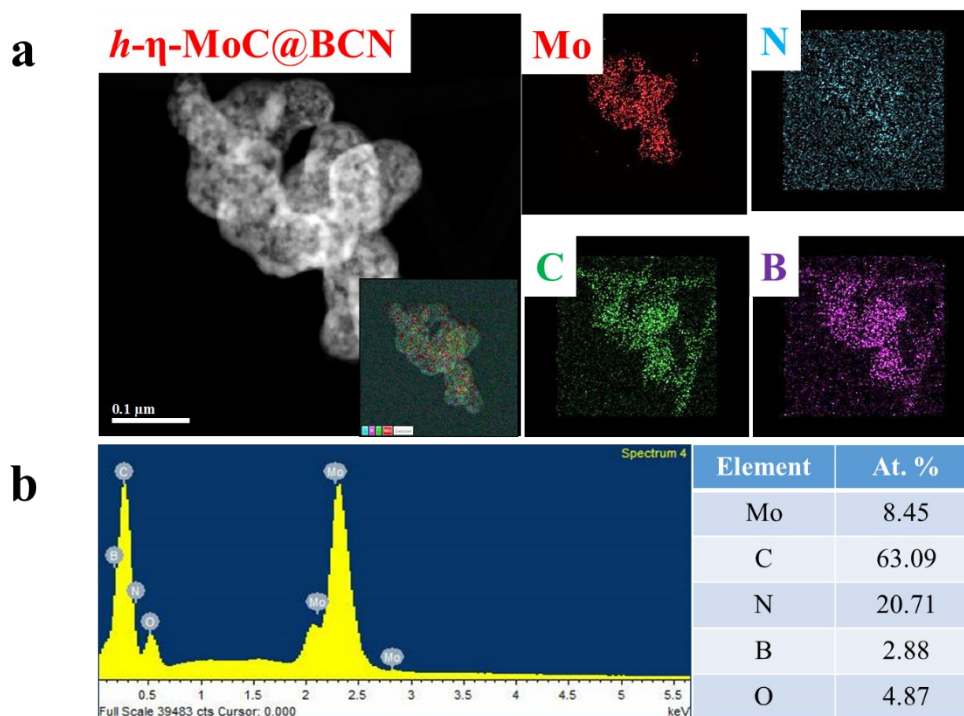

**Figure S7.** EDX elemental mapping of (a) *h*- $\eta$ -MoC@BCN (inset combined image of elemental mapping) and (b) EDS-SEM spectrum with composition in Table.

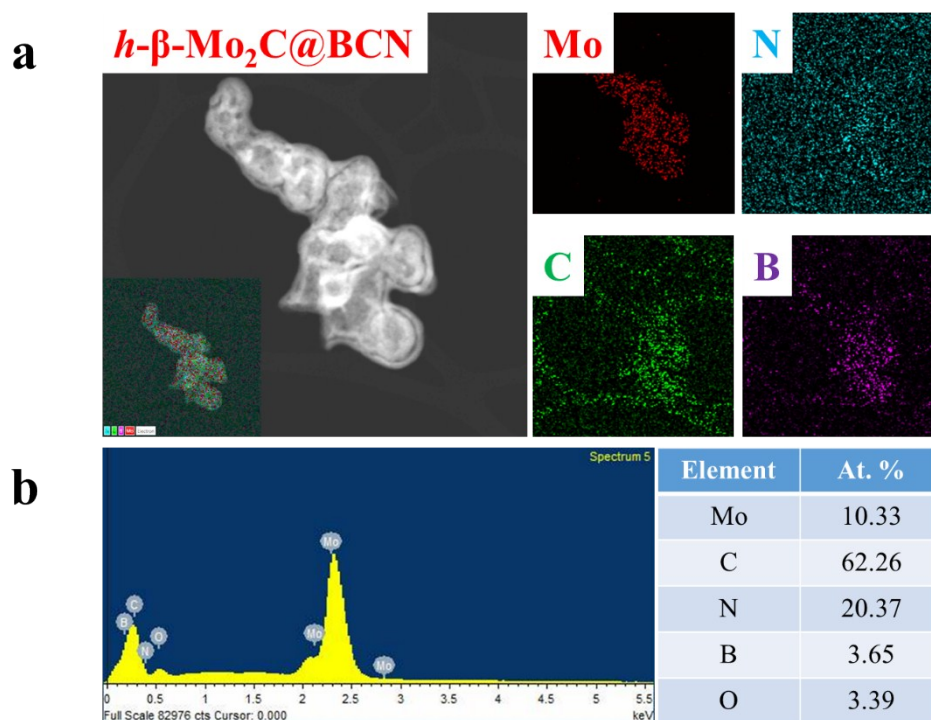

**Figure S8.** EDX elemental mapping of (a) *h*- $\beta$ - $\text{Mo}_2\text{C}@BCN$  (inset combined image of elemental mapping) and (b) EDS-SEM spectrum with composition in Table.

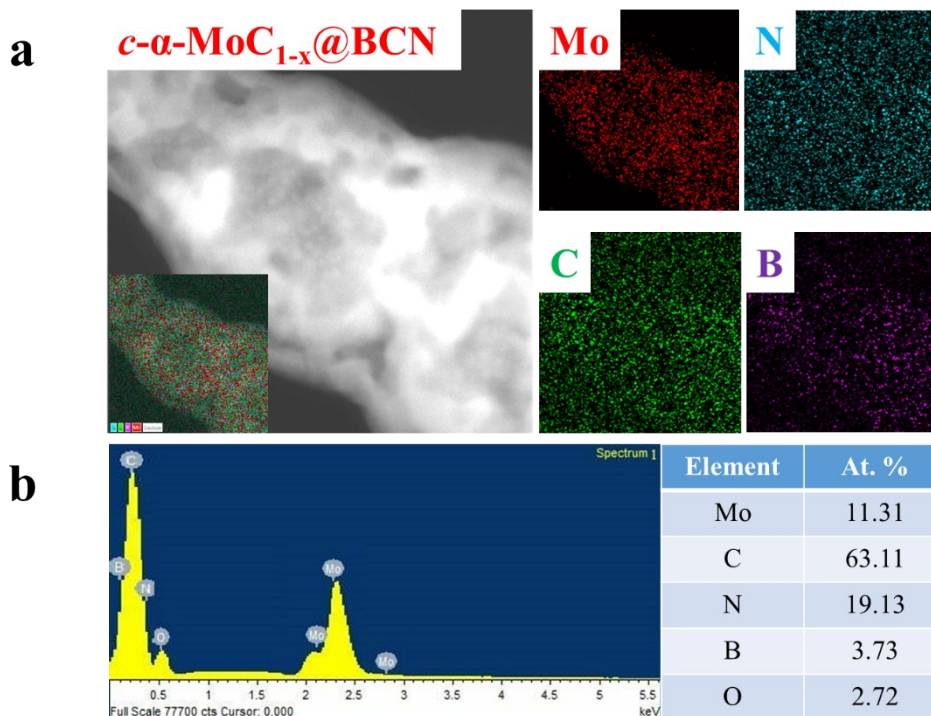

**Figure S9.** EDX elemental mapping of (a) *c*- $\alpha$ - $\text{MoC}_{1-x}@BCN$  (inset combined image of elemental mapping) and (b) EDS-SEM spectrum with composition in Table.

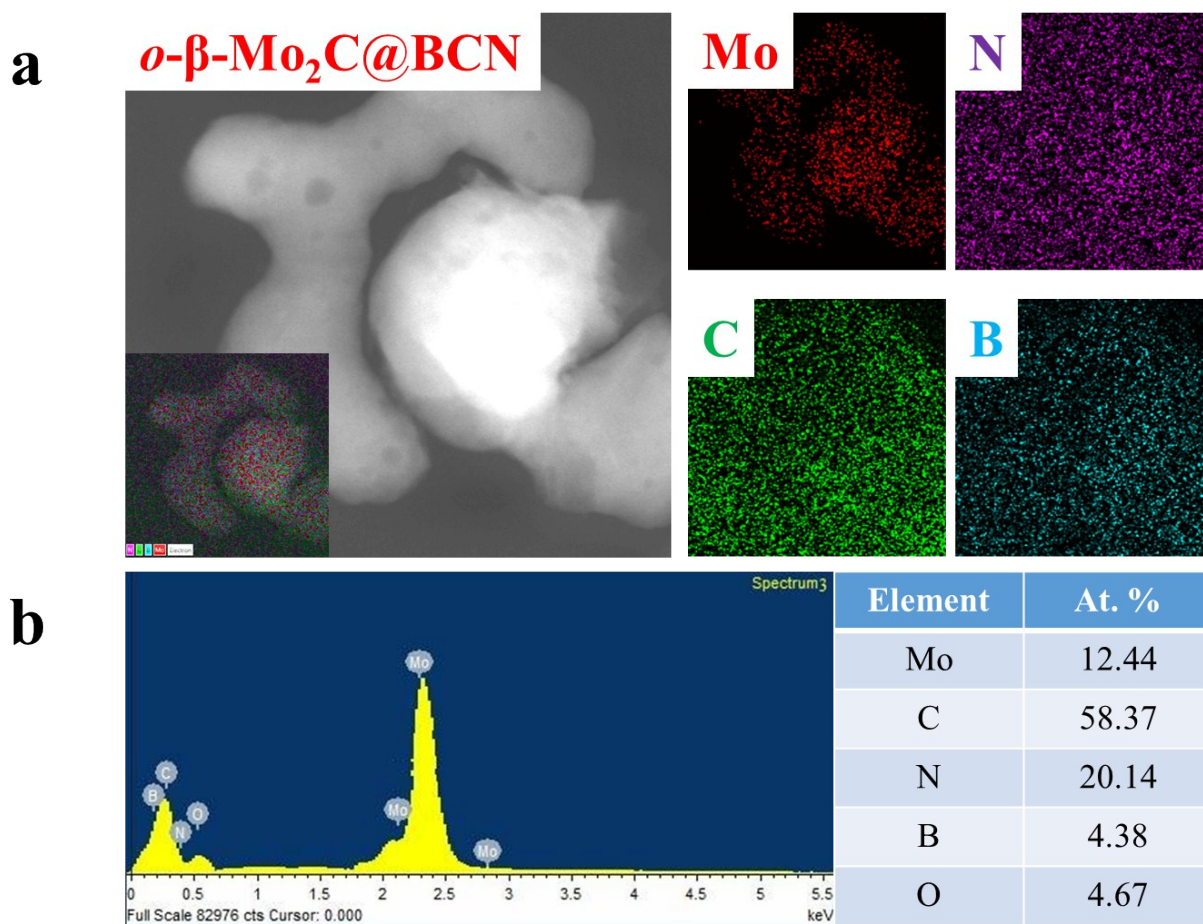

**Figure S10.** EDX elemental mapping of (a)  $o\text{-}\beta\text{-Mo}_2\text{C@BCN}$  (inset combined image of elemental mapping) and (b) EDS-SEM spectrum with composition in Table.

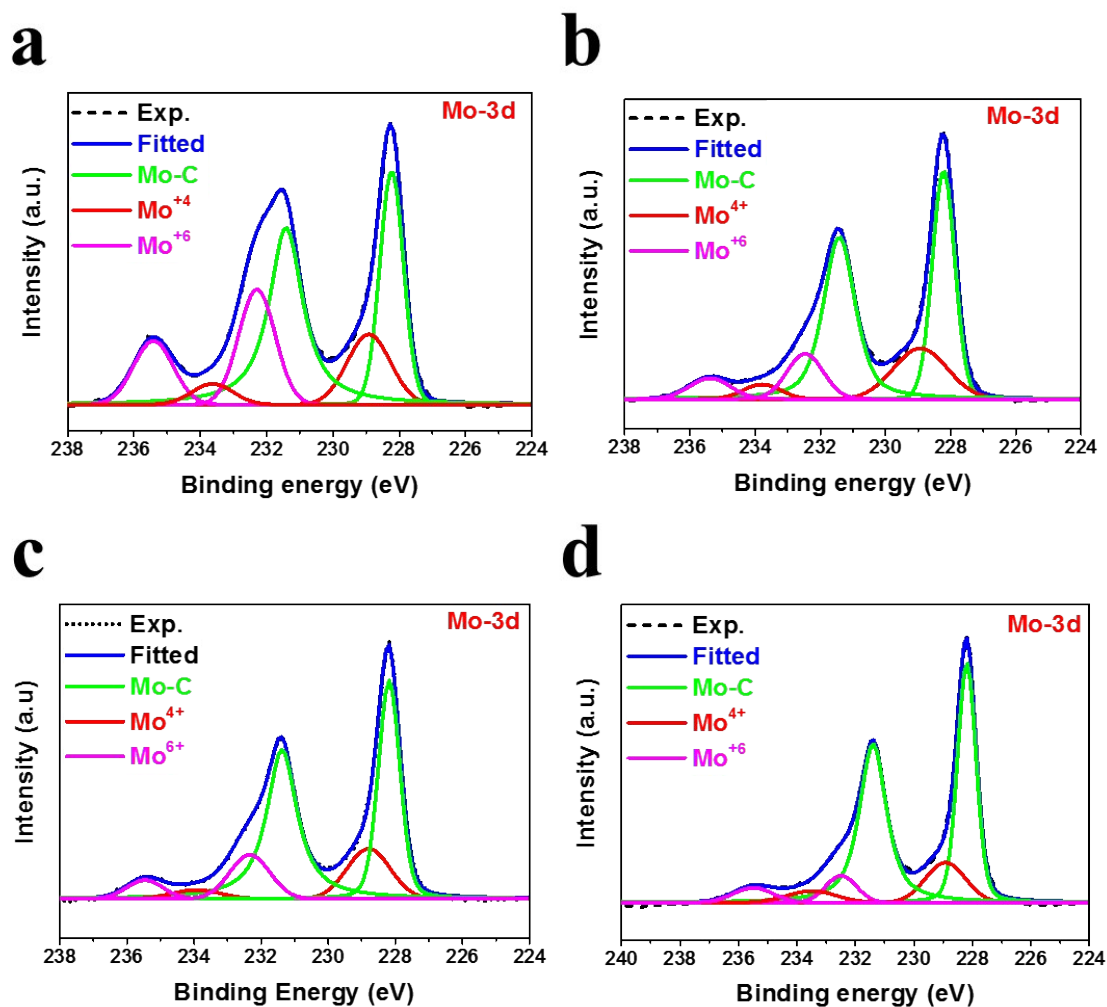

**Figure S11.** X-ray photoelectron spectroscopy (XPS) spectra: a) Orthorhombic  $\alpha$ -Mo<sub>2</sub>C@BCN; b) Hexagonal  $\eta$ -MoC@BCN; c) Hexagonal  $\beta$ -Mo<sub>2</sub>C@BCN; d) Orthorhombic  $\beta$ -Mo<sub>2</sub>C@BCN.

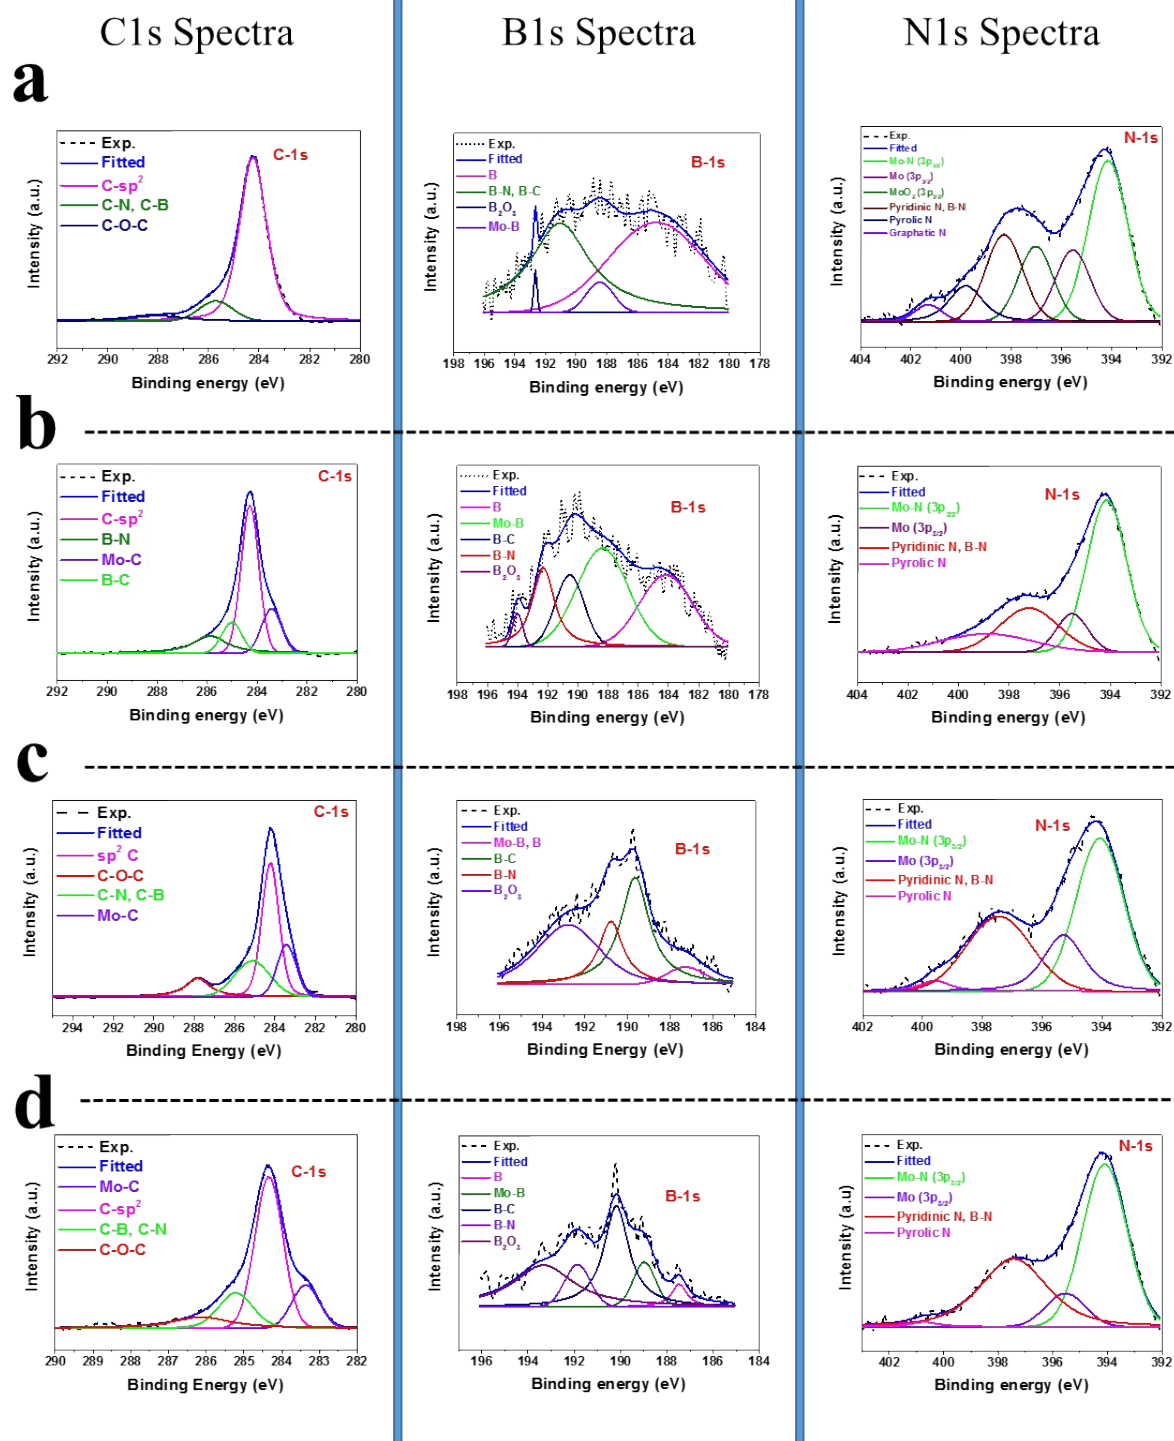

**Figure S12.** XPS spectra (without background) and fitted peaks of C1s, B1s and N1s for (a) orthorhombic  $\alpha$ -Mo<sub>2</sub>C@BCN, (b) hexagonal  $\eta$ -MoC@BCN, (c) hexagonal  $\beta$ -Mo<sub>2</sub>C@BCN, and (d) orthorhombic  $\beta$ -Mo<sub>2</sub>C@BCN

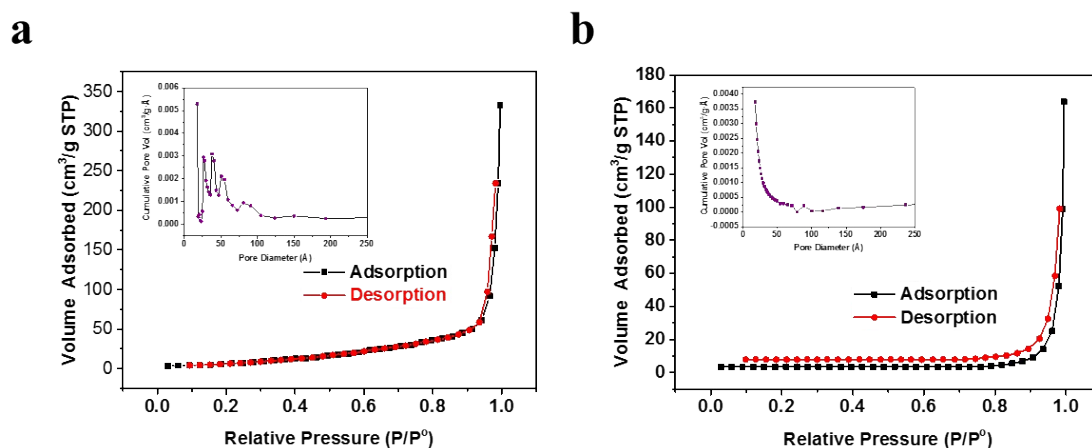

**Figure S13.** Nitrogen adsorption-desorption isotherms of (a) hexagonal  $\beta$ - $\text{Mo}_2\text{C}@$ BCN and (b) cubic  $\alpha$ - $\text{MoC}_{1-x}@$ BCN. Insets show pore size distributions.

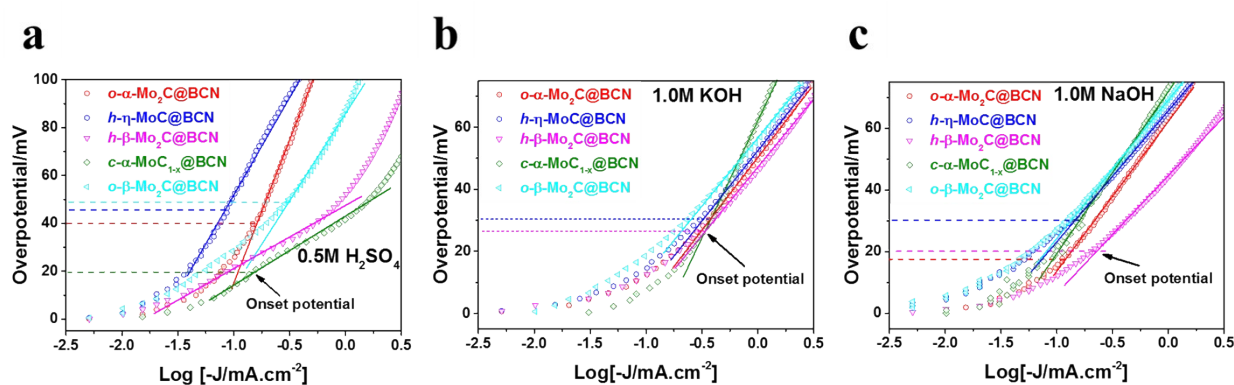

**Figure S14.** Tafel plots in of low current densities region of all hybrid electrocatalysts in 0.5M  $\text{H}_2\text{SO}_4$  (a), 1.0M KOH (b) and 1.0M NaOH (c). The onset overvoltage is determined by the potential when the Tafel plots begin to deviate from the linear region as indicated by the arrow.

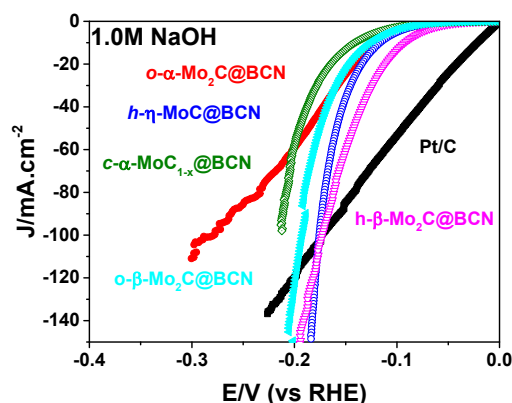

**Figure S15.** Out-class HER performance of hybrid catalysts than Pt/C at higher current densities in alkaline media

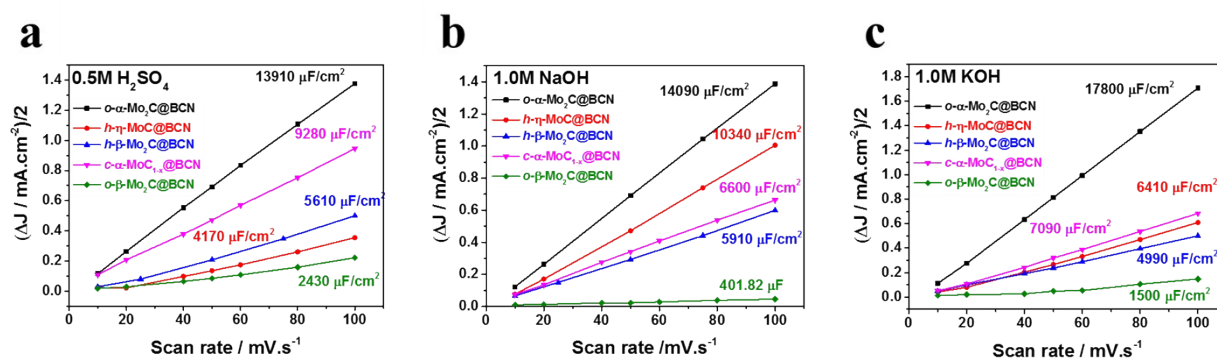

**Figure S16.** Half of current density differences ( $\Delta j = J_a - J_c$ ) plotted against scan rates in (a) 0.5M H<sub>2</sub>SO<sub>4</sub>, (b) 1.0M NaOH and (c) 1.0M KOH. Specific capacitances ( $\mu\text{F cm}^{-2}$ ) are equivalent to the linear slopes of each curve which is used to calculate ECSA

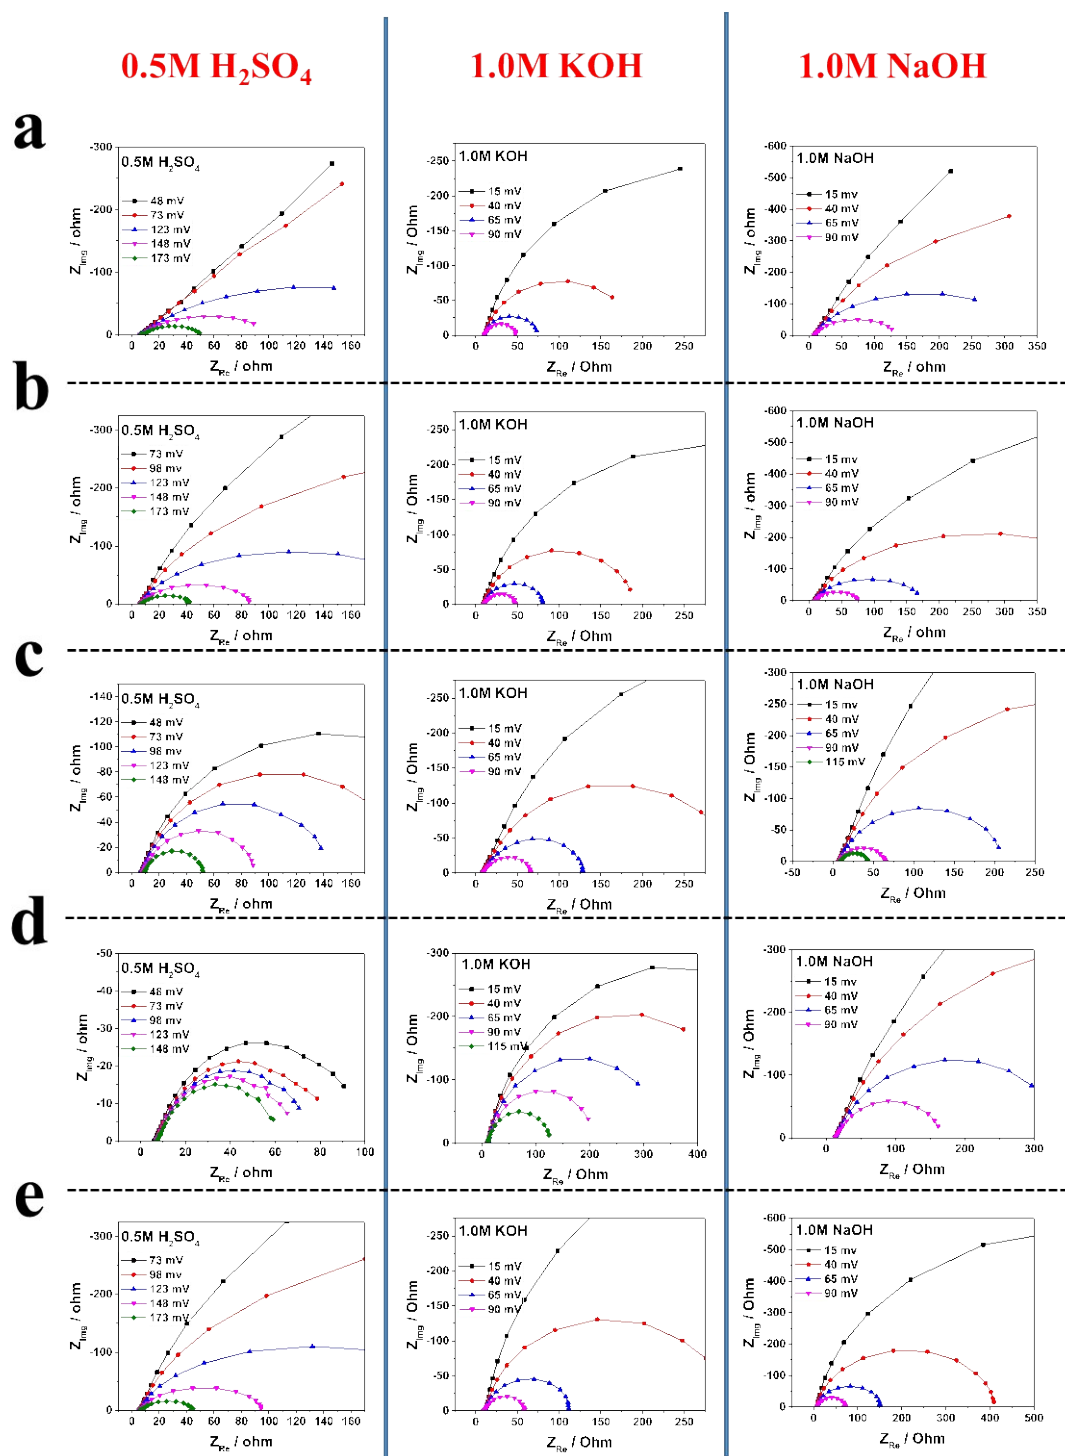

**Figure S17.** Electrochemical impedance spectroscopy (EIS) analysis for all composites: (a) for o- $\alpha$ - $\text{Mo}_2\text{C}@BCN$ , (b) h- $\eta$ - $\text{Mo}_2\text{C}@BCN$ , (c) h- $\beta$ - $\text{Mo}_2\text{C}@BCN$ , (d) c- $\alpha$ - $\text{MoC}_{1-x}@BCN$  and (e) o- $\beta$ - $\text{Mo}_2\text{C}@BCN$  in 0.5M  $\text{H}_2\text{SO}_4$ , 1.0M KOH and 1.0M NaOH, respectively



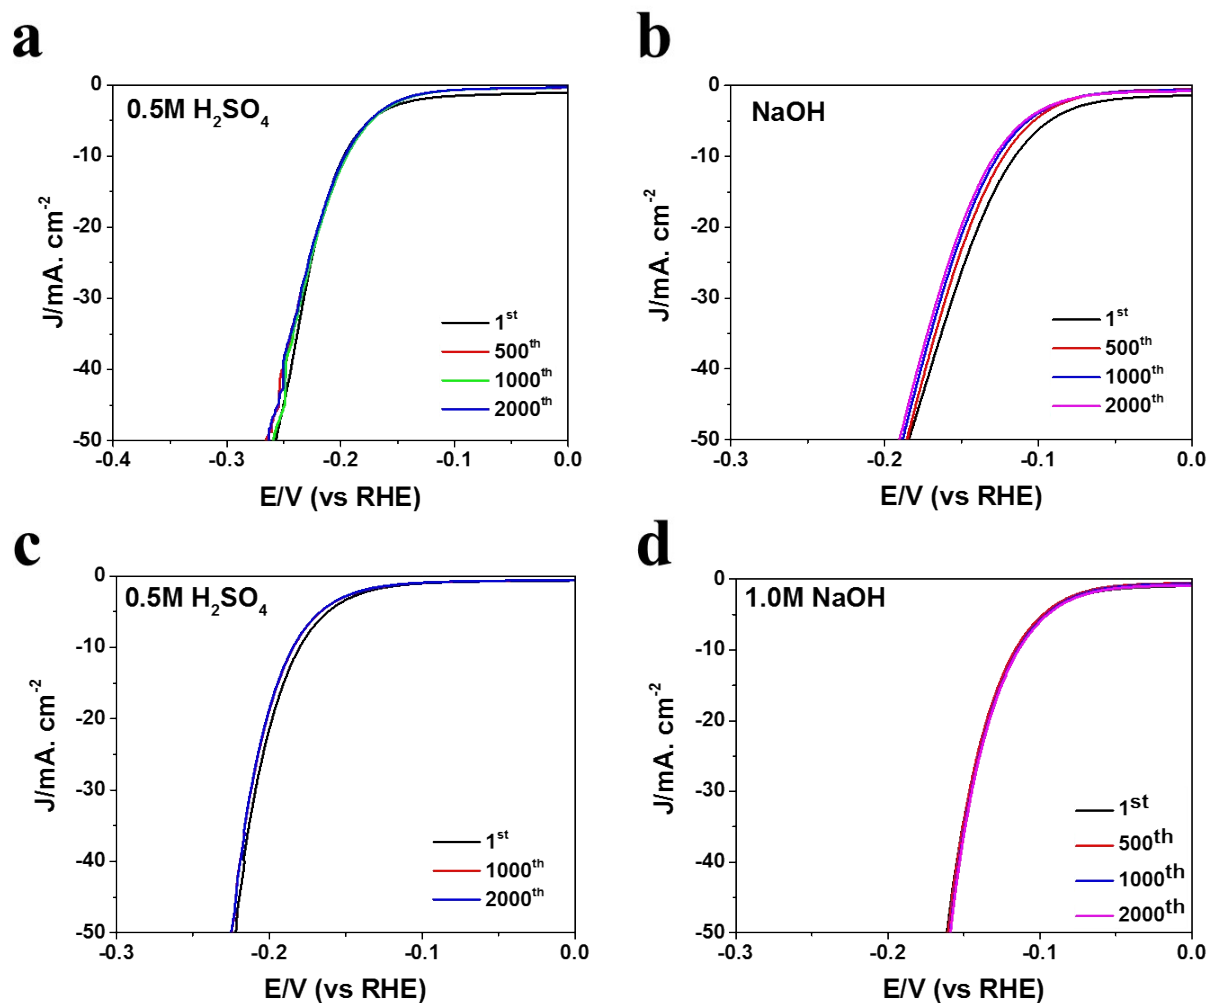

**Figure S18.** Polarization curves after continuous potential CV cycles up to 2000 of (a-b) o-α-Mo<sub>2</sub>C@BCN and (c-d) h-η-Mo<sub>2</sub>C@BCN in acidic and alkaline solutions, respectively.

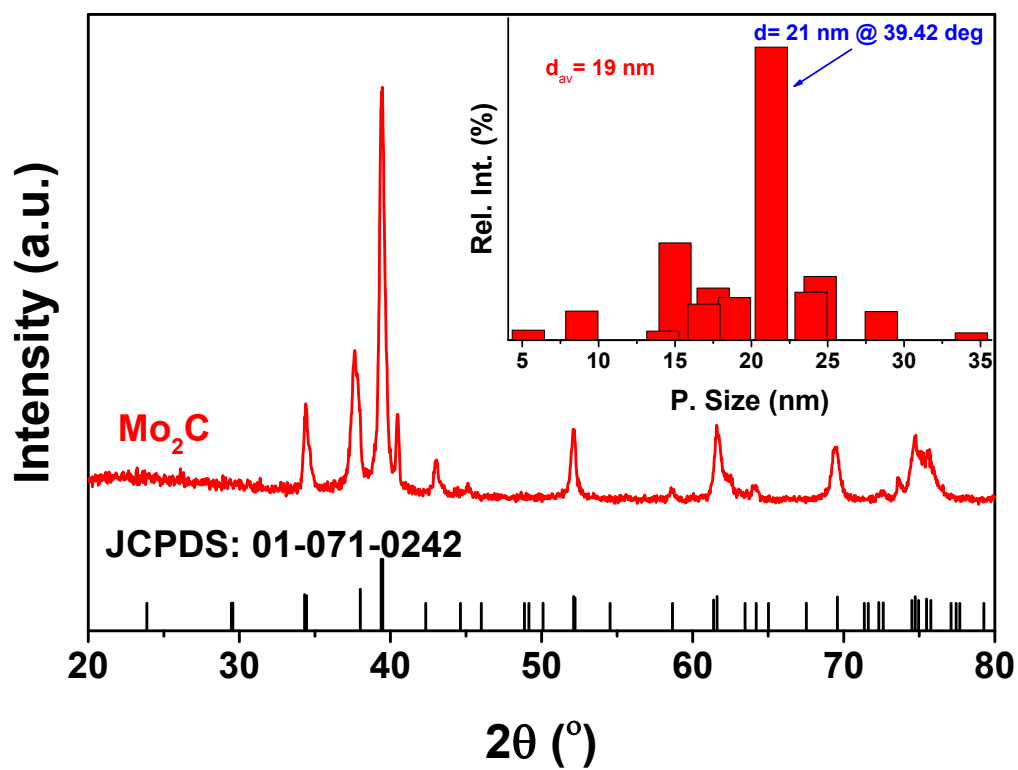

**Figure S19.** XRD pattern of N-doped Molybdenum carbide without BCN network, particle size distribution (inset)

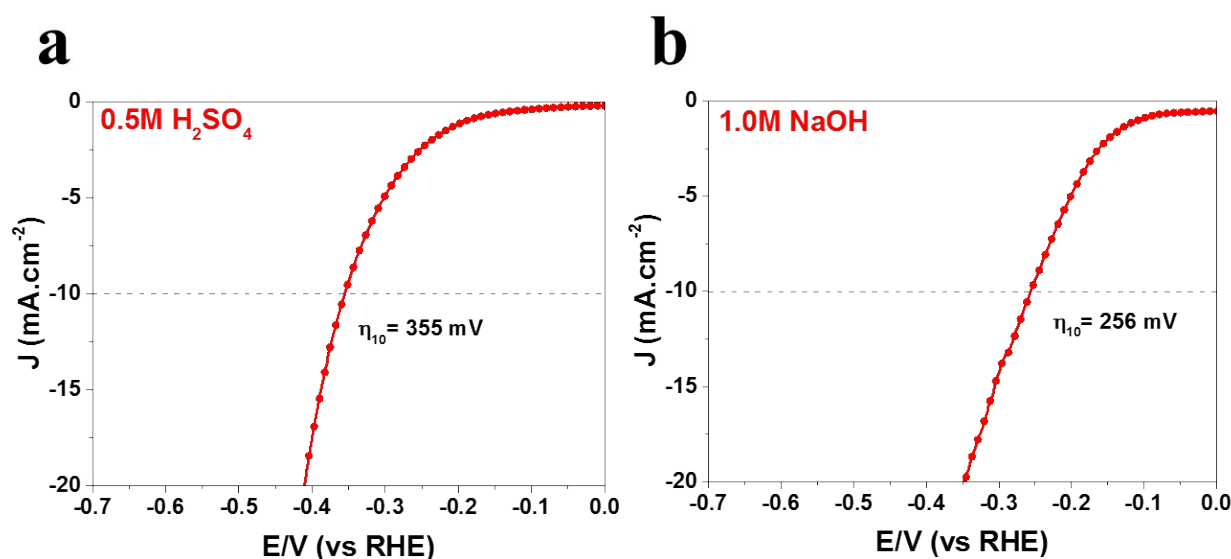

**Figure S20.** HER activity of N-doped molybdenum carbide without BCN protection in acidic and basic media. (a) 0.5M H<sub>2</sub>SO<sub>4</sub> and (b) 1.0M NaOH

## References

- 1 N. S. Alhajri, D. H. Anjum and K. Takanabe, *J. Mater. Chem. A*, 2014, **2**, 10548-10556.
- 2 S. T. Hunt, T. Nimmanwudipong and Y. Román-Leshkov, *Angew. Chem. Int. Ed.*, 2014, **53**, 5131-5136.
- 3 W. Cui, N. Cheng, Q. Liu, C. Ge, A. M. Asiri and X. Sun, *ACS Catal.*, 2014, **4**, 2658-2661.
- 4 M. Boride, *Angew. Chem. Int. Ed.*, 2012, **51**, 12703-12706.
- 5 C. Ge, P. Jiang, W. Cui, Z. Pu, Z. Xing, A. M. Asiri, A. Y. Obaid, X. Sun and J. Tian, *Electrochim. Acta*, 2014, **134**, 182-186.
- 6 L. Ma, L. R. L. Ting, V. Molinari, C. Giordano and B. S. Yeo, *J. Mater. Chem. A*, 2015, **3**, 8361-8368.
- 7 K. Zhang, Y. Zhao, S. Zhang, H. Yu, Y. Chen, P. Gao and C. Zhu, *J. Mater. Chem. A*, 2014, **2**, 18715-18719.
- 8 W.-F. Chen, S. Iyer, S. Iyer, K. Sasaki, C.-H. Wang, Y. Zhu, J. T. Muckerman and E. Fujita, *Energy Environ. Sci.*, 2013, **6**, 1818-1826.
- 9 C. Tang, W. Wang, A. Sun, C. Qi, D. Zhang, Z. Wu and D. Wang, *ACS Catal.*, 2015, **5**, 6956-6963.
- 10 W.-F. Chen, C.-H. Wang, K. Sasaki, N. Marinkovic, W. Xu, J. Muckerman, Y. Zhu and R. Adzic, *Energy Environ. Sci.*, 2013, **6**, 943-951.
- 11 P. Xiao, Y. Yan, X. Ge, Z. Liu, J.-Y. Wang and X. Wang, *Appl. Catal. B: Environ.*, 2014, **154**, 232-237.
- 12 J. Zhang, X. Meng, J. Zhao and Z. Zhu, *ChemCatChem*, 2014, **6**, 2059-2064.
- 13 K. Zhang, Y. Zhao, D. Fu and Y. Chen, *J. Mater. Chem. A*, 2015, **3**, 5783-5788.
- 14 Y. Zhao, K. Kamiya, K. Hashimoto and S. Nakanishi, *J. Am. Chem. Soc.*, 2014, **137**, 110-113.
- 15 H. B. Wu, B. Y. Xia, L. Yu, X.-Y. Yu and X. W. D. Lou, *Nat. Commun.*, 2015, **6**.
- 16 D. H. Youn, S. Han, J. Y. Kim, J. Y. Kim, H. Park, S. H. Choi and J. S. Lee, *ACS Nano*, 2014, **8**, 5164-5173.
- 17 L. F. Pan, Y. H. Li, S. Yang, P. F. Liu, M. Q. Yu and H. G. Yang, *Chem. Commun.*, 2014, **50**, 13135-13137.
- 18 L. Liao, S. Wang, J. Xiao, X. Bian, Y. Zhang, M. D. Scanlon, X. Hu, Y. Tang, B. Liu and H. H. Girault, *Energy Environ. Sci.*, 2014, **7**, 387-392.
- 19 Y. Liu, G. Yu, G. D. Li, Y. Sun, T. Asefa, W. Chen and X. Zou, *Angew. Chem. Int. Ed.*, 2015, **54**, 10752-10757.
- 20 H. Ang, H. T. Tan, Z. M. Luo, Y. Zhang, Y. Y. Guo, G. Guo, H. Zhang and Q. Yan, *Small*, 2015, **11**, 6278-6284.
- 21 S. Wang, J. Wang, M. Zhu, X. Bao, B. Xiao, D. Su, H. Li and Y. Wang, *J. Am. Chem. Soc.*, 2015, **137**, 15753-15759.
- 22 C. Wan, Y. N. Regmi and B. M. Leonard, *Angew. Chem.*, 2014, **126**, 6525-6528.
- 23 H. Zhang, Z. Ma, J. Duan, H. Liu, G. Liu, T. Wang, K. Chang, M. Li, L. Shi and X. Meng, *ACS Nano*, 2015.
- 24 H. Vrabel and X. Hu, *Angew. Chem.*, 2012, **124**, 12875-12878.
- 25 J. Kibsgaard and T. F. Jaramillo, *Angew. Chem. Int. Ed.*, 2014, **53**, 14433-14437.
